# Supplementary material for: Integrating molecular diagnostics into anticancer drug discovery
Source: Springer Nature journal article supplement (doi:10.1038/nrd3135), 2010-06-07
Supplement: 41573_2010_BFnrd3135_MOESM3_ESM.pdf [file 41573_2010_BFnrd3135_MOESM3_ESM.pdf]

**Supplementary information S2 (online only)**

Table S2 | Major clinical responses to signal transduction therapies are usually associated with the presence of cancer specific genetic changes detected by molecular diagnostic methods.

| CANCER TYPE                                                                                                              | DRUG                   | TARGET                               | DIAGNOSTICS         |
|--------------------------------------------------------------------------------------------------------------------------|------------------------|--------------------------------------|---------------------|
| <b>Molecular targeted drugs achieving 50-90% clinical response rate and several years survival</b>                       |                        |                                      |                     |
| CML                                                                                                                      | Imatinib               | Translocated Abl gene (Bcr-Abl)      | FISH                |
| GIST                                                                                                                     | Imatinib               | Mutant C-Kit                         | IHC/sequencing      |
| Lung cancer                                                                                                              | Erlotinib<br>Gefitinib | Mutant<br>EGFR                       | Sequencing          |
| <b>Molecular targeted drugs achieving around 30% or more clinical response rate and several months or years survival</b> |                        |                                      |                     |
| Breast cancer                                                                                                            | Trastuzumab            | High copy of wild type<br>HER-2 gene | IHC/FISH            |
| Colon cancer                                                                                                             | Cetuximab              | High copy of wild type<br>EGFR       | FISH                |
| <b>Molecular targeted drugs achieving less than 30% clinical response rate and a few months survival</b>                 |                        |                                      |                     |
| Lung cancer                                                                                                              | Erlotinib<br>Gefitinib | wild type EGFR                       | IHC or no selection |
| Colon cancer                                                                                                             | Cetuximab              | Wild type<br>EGFR                    | IHC                 |
